# Supplementary material
Source: publisher site journal article supplement (https://www.dovepress.com/article/310630)
Supplement: Supplementary file 1 [file get_supplementary_file.php]

**Supplementary Table 1. Multivariate Associations of MRCI Scores and Medication Counts with Adherence to COPD Medications**

|  | **COPD Medication Adherence**  **(Self-reported)** | | **COPD Medication Adherence**  **(Electronic)** | | **COPD Medication Adherence**  **(Self-reported)** | | **COPD Medication Adherence**  **(Electronic)** | |
| --- | --- | --- | --- | --- | --- | --- | --- | --- |
|  | **OR (95% CI)** | **P** | **OR (95% CI)** | **P** | **OR (95% CI)** | **P** | **OR (95% CI)** | **P** |
| MCRI  1st quartile  2nd quartile  3rd quartile  4th quartile | Ref.  0.66 (0.34-1.28)  0.90 (0.46-1.77)  1.19 (0.60-2.37) | .22  .76  .61 | Ref.  1.92 (0.96-3.84)  1.66 (0.82-3.35)  2.10 (0.99-4.43) | .06  .16  .05 | -  -  -  - |  | -  -  -  - |  |
| Medication count  1st quartile  2nd quartile  3rd quartile  4th quartile | -  -  -  - |  | -  -  -  - |  | Ref.  0.47 (0.24-0.93)  0.84 (0.45-1.60)  0.60 (0.30-1.22) | .03  .60  .16 | Ref.  0.40 (0.19-0.82)  1.21 (0.61-2.40)  0.81 (0.38-1.73) | .01  .58  .59 |
| Age category  50-59  60-69  70-79  80+ | Ref.  0.90 (0.45-1.82)  0.71 (0.34-1.49)  0.42 (0.28-1.88) | .77  .37  .51 | Ref.  0.90 (0.41-1.95)  0.63 (0.28-1.42)  1.34 (0.49-3.70) | .78  .26  .57 | Ref.  0.86 (0.42-1.75)  0.70 (0.33-1.49)  0.64 (0.24-1.65) | .67  .36  .35 | Ref.  0.87 (0.39-1.95)  0.71 (0.31-1.62)  1.21 (0.43-3.39) | .74  .41  .72 |
| Male sex | 0.73 (0.44-1.21) | .22 | 0.94 (0.56-1.57) | .81 | 0.73 (0.44-1.22) | .23 | 0.94 (0.56-1.59) | .81 |
| Race and ethnicity  White, non-Hispanic  Black, non-Hispanic  Hispanic | Ref.  1.68 (0.88-3.21)  1.83 (0.75-4.46) | .12  .18 | Ref.  1.40 (0.69-2.83)  2.89 (1.06-7.89) | .35  .04 | Ref.  1.54 (0.80-2.98)  1.74 (0.71-4.27) | .20  .23 | Ref.  1.54 (0.75-3.14)  2.98 (1.09-8.15) | .24  .03 |
| Education  College graduate  Some college  High school graduate  Some high school | Ref.  1.33 (0.72-2.48)  1.07 (0.53-2.15)  2.31 (0.90-5.97) | .36  .85  .08 | Ref.  0.85 (0.45-1.62)  0.48 (0.22-1.04)  1.05 (0.38-2.94) | .62  .06  .92 | Ref.  1.36 (0.73-2.52)  1.05 (0.52-2.12)  2.40 (0.93-6.25) | .34  .90  .07 | Ref.  0.81 (0.42-1.54)  0.50 (0.23-1.10)  1.13 (0.40-3.19) | .52  .08  .82 |
| Low English language proficiency | 2.89 (0.54-15.3) | .21 | 0.42 (0.10-1.79) | .24 | 3.04 (0.56-6.42) | .20 | 0.40 (0.09-1.87) | .25 |
| Low health literacy | 1.21 (0.61-2.40) | .58 | 1.10 (0.54-2.23) | .80 | 1.31 (0.66-2.60) | .45 | 1.21 (0.58-2.51) | .61 |
| Insurance  Private  Any Medicaid  Medicare | Ref.  0.86 (0.43-1.71)  0.76 (0.35-1.66) | .66  .49 | Ref.  1.24 (0.58-2.66)  0.58 (0.25-1.35) | .58  .21 | Ref.  0.93 (0.47-1.83)  0.79 (0.37-1.68) | .83  .54 | Ref.  1.40 (0.65-3.00)  0.54 (0.24-1.22) | .39  .14 |
| Depression | 0.90 (0.45-1.79) | .76 | 1.19 (0.56-2.52) | .65 | 1.02 (0.50-2.04) | .97 | 1.16 (0.54-2.48) | .71 |
| Executive function impairment | 3.01 (1.32-6.87) | .009 | 1.55 (0.66-3.62) | .31 | 3.09 (1.34-7.13) | .008 | 1.47 (0.62-3.46) | .38 |
| MRCI, medication regimen complexity index; COPD, chronic obstructive pulmonary disease. | | | | | | | | |

**Supplementary Table 2. Multivariate Associations of MRCI Scores and Medication Counts with Adherence to Hypertension Medications**

|  | **Hypertension Medication Adherence** | | | |
| --- | --- | --- | --- | --- |
|  | **OR (95% CI)** | **P** | **OR (95% CI)** | **P** |
| MCRI  1st quartile  2nd quartile  3rd quartile  4th quartile | Ref.  0.64 (0.30-1.39)  0.46(0.20-1.05)  1.01 (0.46-2.21) | .26  .07  .99 | -  -  -  - |  |
| Medication count  1st quartile  2nd quartile  3rd quartile  4th quartile | -  -  -  - |  | 0.83 (0.39-1.77)  0.95 (0.46-1.98)  0.43 (0.17-1.11) | .63  .89  .08 |
| MRCI, medication regimen complexity index; COPD, chronic obstructive pulmonary disease.  Analyses adjusted for age, sex, race and ethnicity, education, English language proficiency, level of health literacy, insurance, depression and cognitive impairment. | | | | | |
